# Supplementary material for: Single-cell intracellular epitope and transcript detection reveals signal transduction dynamics
Source: PubMed Central journal article supplement (PMC9017125; doi:10.1016/j.crmeth.2021.100070), 2021-09-15
Supplement: mmc1.pdf [file mmc1.pdf]

**Cell Reports Methods, Volume 1**

**Supplemental information**

**Single-cell intracellular epitope and transcript  
detection reveals signal transduction dynamics**

**Francesca Rivello, Erik van Buijtenen, Kinga Matuła, Jessie A.G.L. van Buggenum, Paul Vink, Hans van Eenennaam, Klaas W. Mulder, and Wilhelm T.S. Huck**

# Supplementary Information

## Supplementary Figures

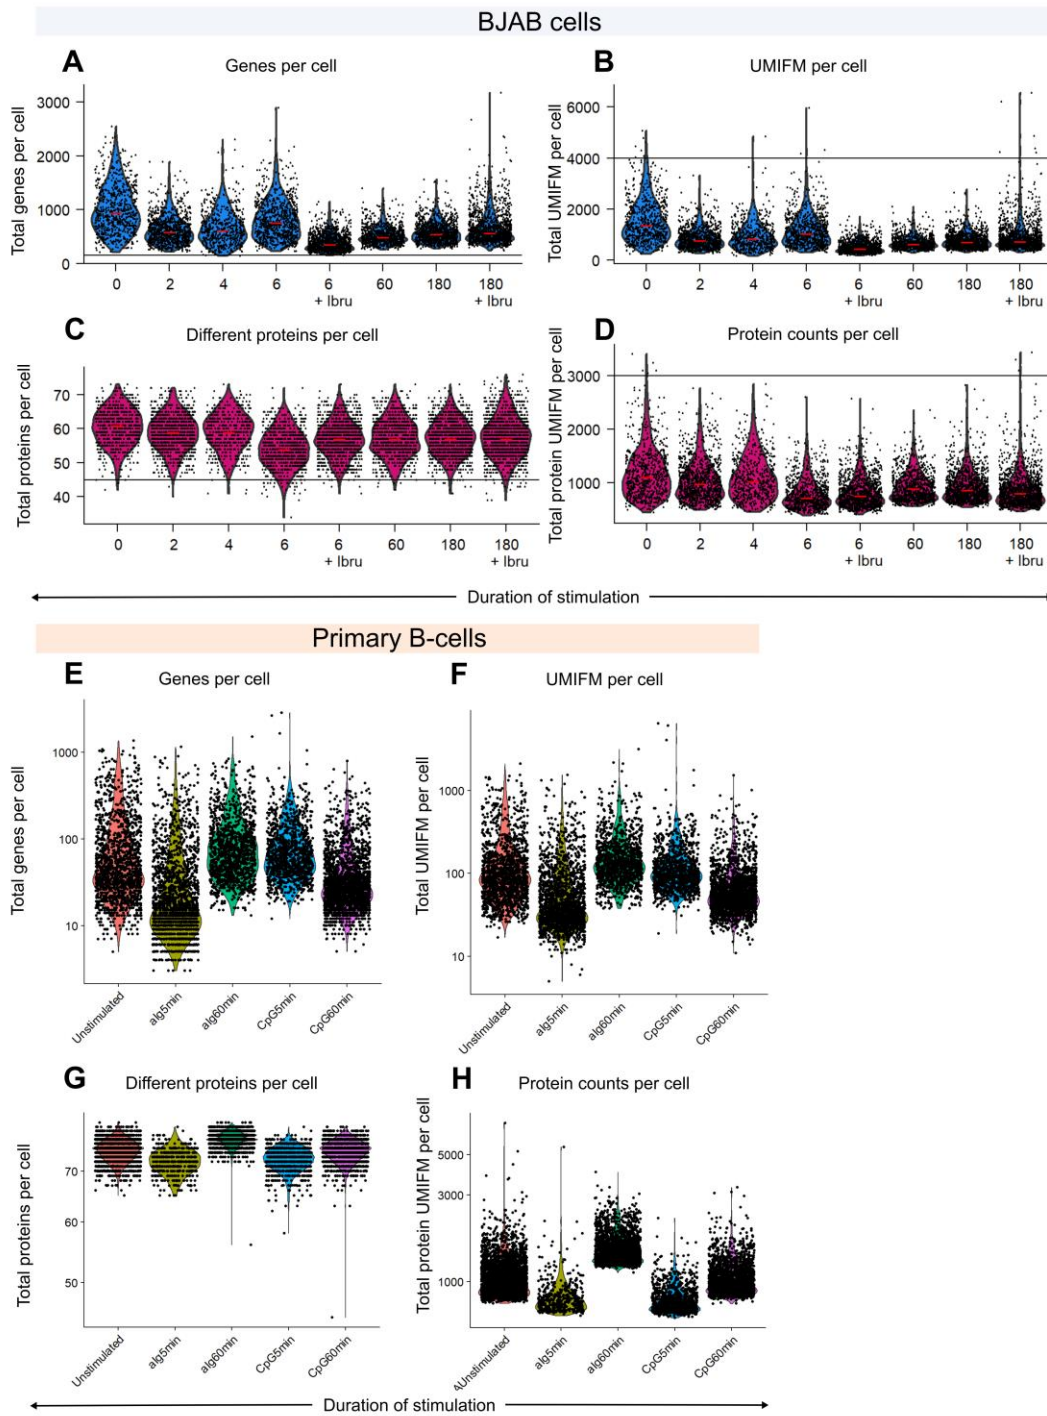

**Supplementary Figure 1: Technical quality of the QuRIE-seq transcriptomic and proteomic libraries on BJAB cells (A-D) and primary B-cells isolated from PBMCs (E-H).** (A-D) BJAB cells at eleven different stimulation and/or inhibition conditions: after stimulation with alg for: 0, 2, 4, 6, 60 and 180 minutes, with or without prior Ibrutinib inhibition. (E-H) Primary B-cells isolated from PBMCs after stimulation with alg or CpG for: 0, 5 and 60 minutes. Violin plots for (A, B, E, F) the transcriptomic and (C, D, G, H) the proteomic libraries. (A, E) The number of different genes detected per cell. (B, F) The number of unique molecular identifiers filtered mapped (UMIFM) detected per cell. (C, G) The number of different proteins detected per cell. (D, H) The number of protein counts per cell.

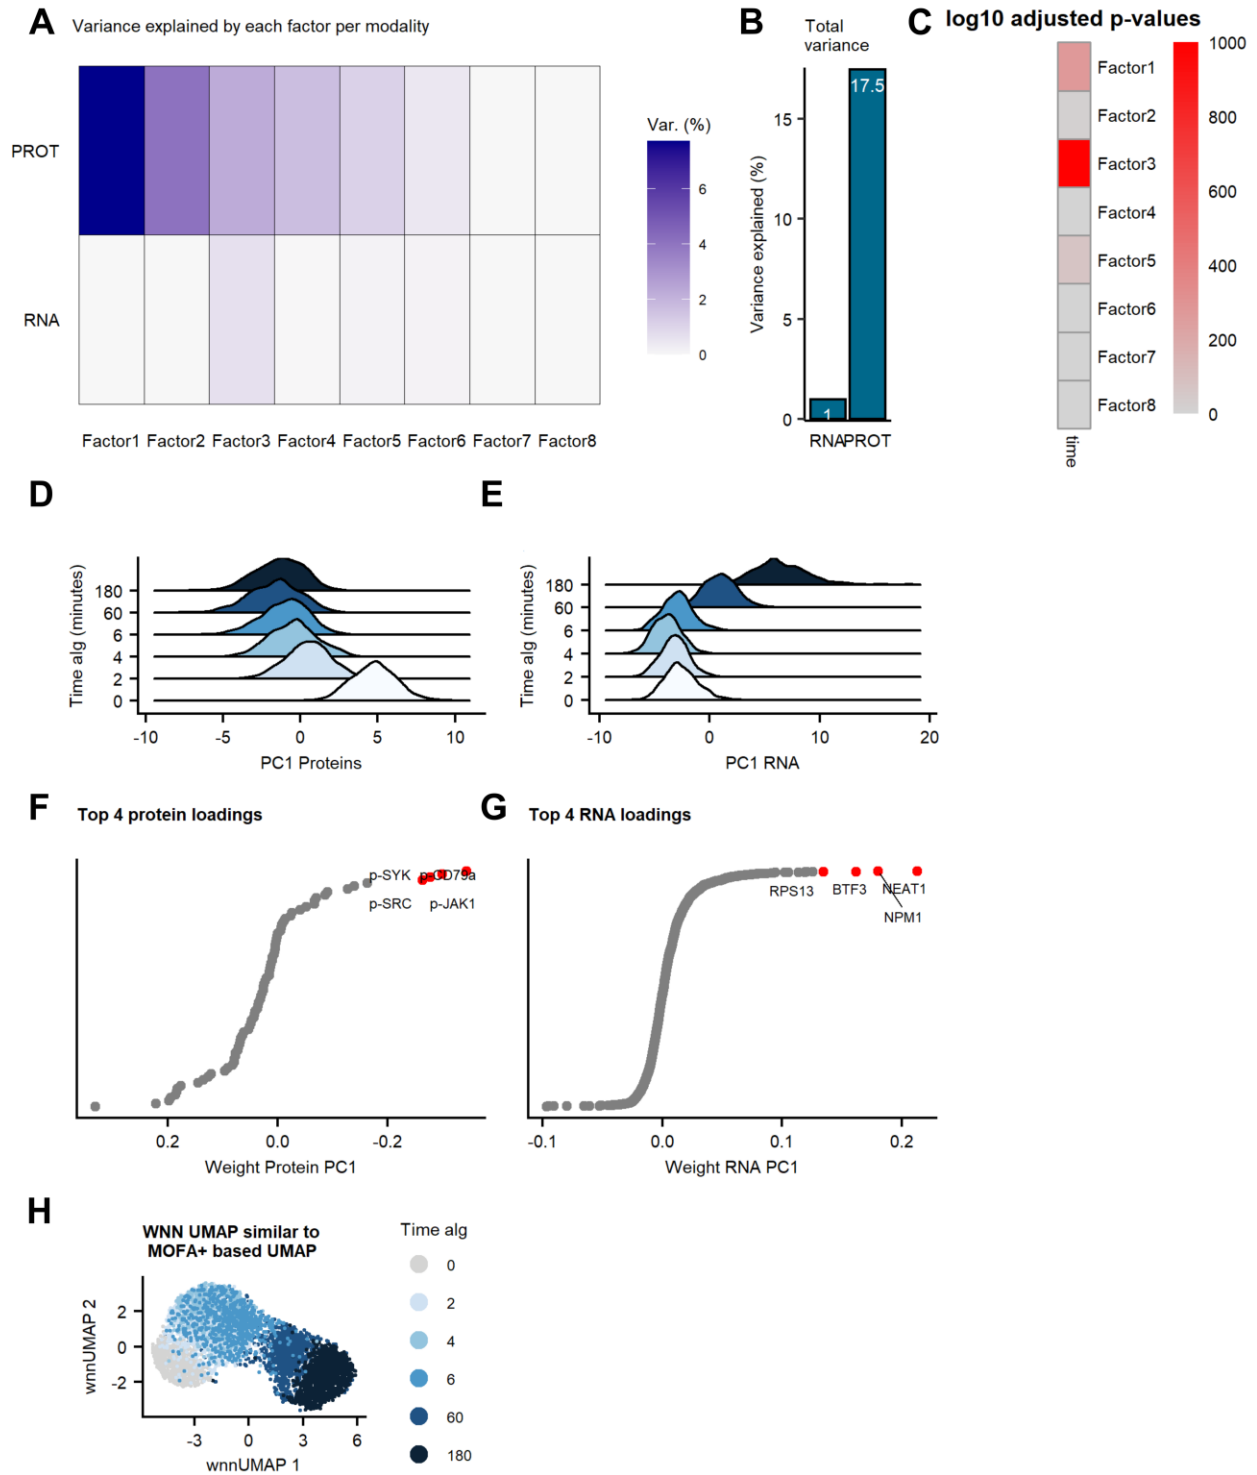

**Supplementary Figure 2: Supplementary results on MOFA+ analysis related to Figure 2. (A)** Percentage of variance explained by each factor per modality (proteins and RNA). **(B)** Percentage of the total variance explained per modality. **(C)** Pearson's correlation (p-value) between the MOFA+ factors and the duration of anti-immunoglobulin antibody (alg) stimulation. **(D-H)** Principal component analysis (PCA) and (Weighted Nearest Neighbor Analysis) WNN analysis using the Seurat package shows similar results to

factor 1 and factor 3 determined by MOFA+ analysis. **(D)** Density plot of protein-based PC1 values as the function of time after stimulation with alg. **(E)** Density plot of RNA-based PC1 values as function of time after stimulation with alg. **(F)** Protein loadings contributing to PC1. The top 4 protein loadings are annotated. **(G)** RNA loadings contributing to PC1. The top 4 RNA loadings are annotated. The results are equivalent to factors 1 and 3 in MOFA+ analysis, respectively. **(H)** UMAP of weighted nearest neighbors computed from RNA and Protein PC's (first 7 dimensions) using Seurat V4.

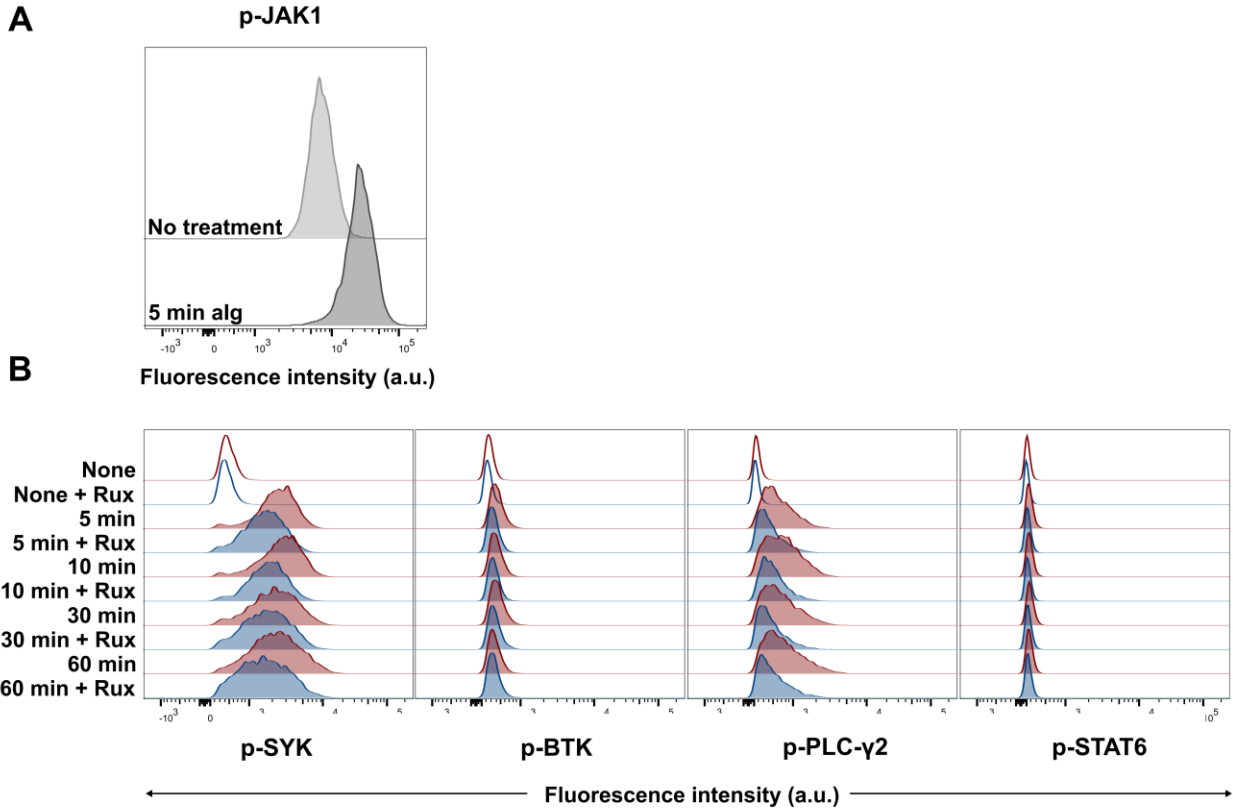

**Supplementary Figure 3: The role of JAK1 in the BCR response to stimulation with alg. Related to Figure 2.** (A) JAK1 phosphorylation after 5 minutes of stimulation with alg characterized by flow cytometry. (B) The phosphorylation level of four proteins: SYK, BTK, PLC-γ2, and STAT6 determined using flow cytometry for unstimulated BJAB cells, and stimulated with alg for: 5, 10, 30, and 60 minutes with (blue curves) or without (red curves) prior Ruxolitinib (Rux) inhibition. *Rux* is a JAK1/2 inhibitor.

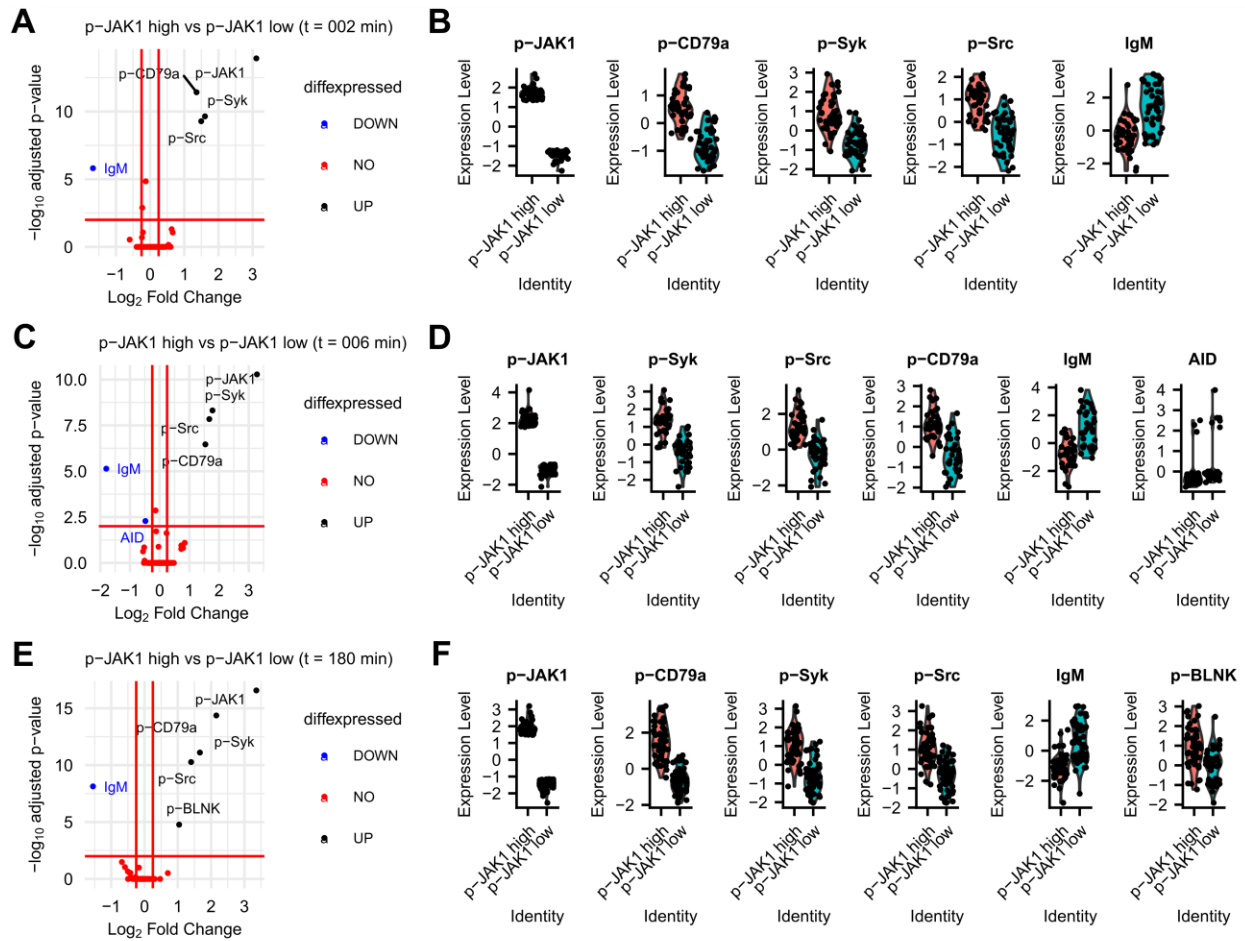

**Supplementary Figure 4. Differential (phospho-)proteins of top 5% versus bottom 5% p-JAK1 cells.** At timepoint t = 2 min (**A, B**), t = 6 min (**C, D**) or t = 180 min (**E, F**) differential expression analysis was performed on normalized and scaled counts, between the subset of cells with high (top 5%) p-JAK1 signal versus low (bottom 5%) p-JAK1 signal (Wilcoxon Rank Sum test). Volcano plots (**A, C, E**) show significant increased or decreased phospho-proteins ( $\text{Log}_2$  Fold Change > 0.25 or < -0.25; adjusted p-val < 0.05). Violin plots (**B, D, F**) illustrate the highlighted significant features.

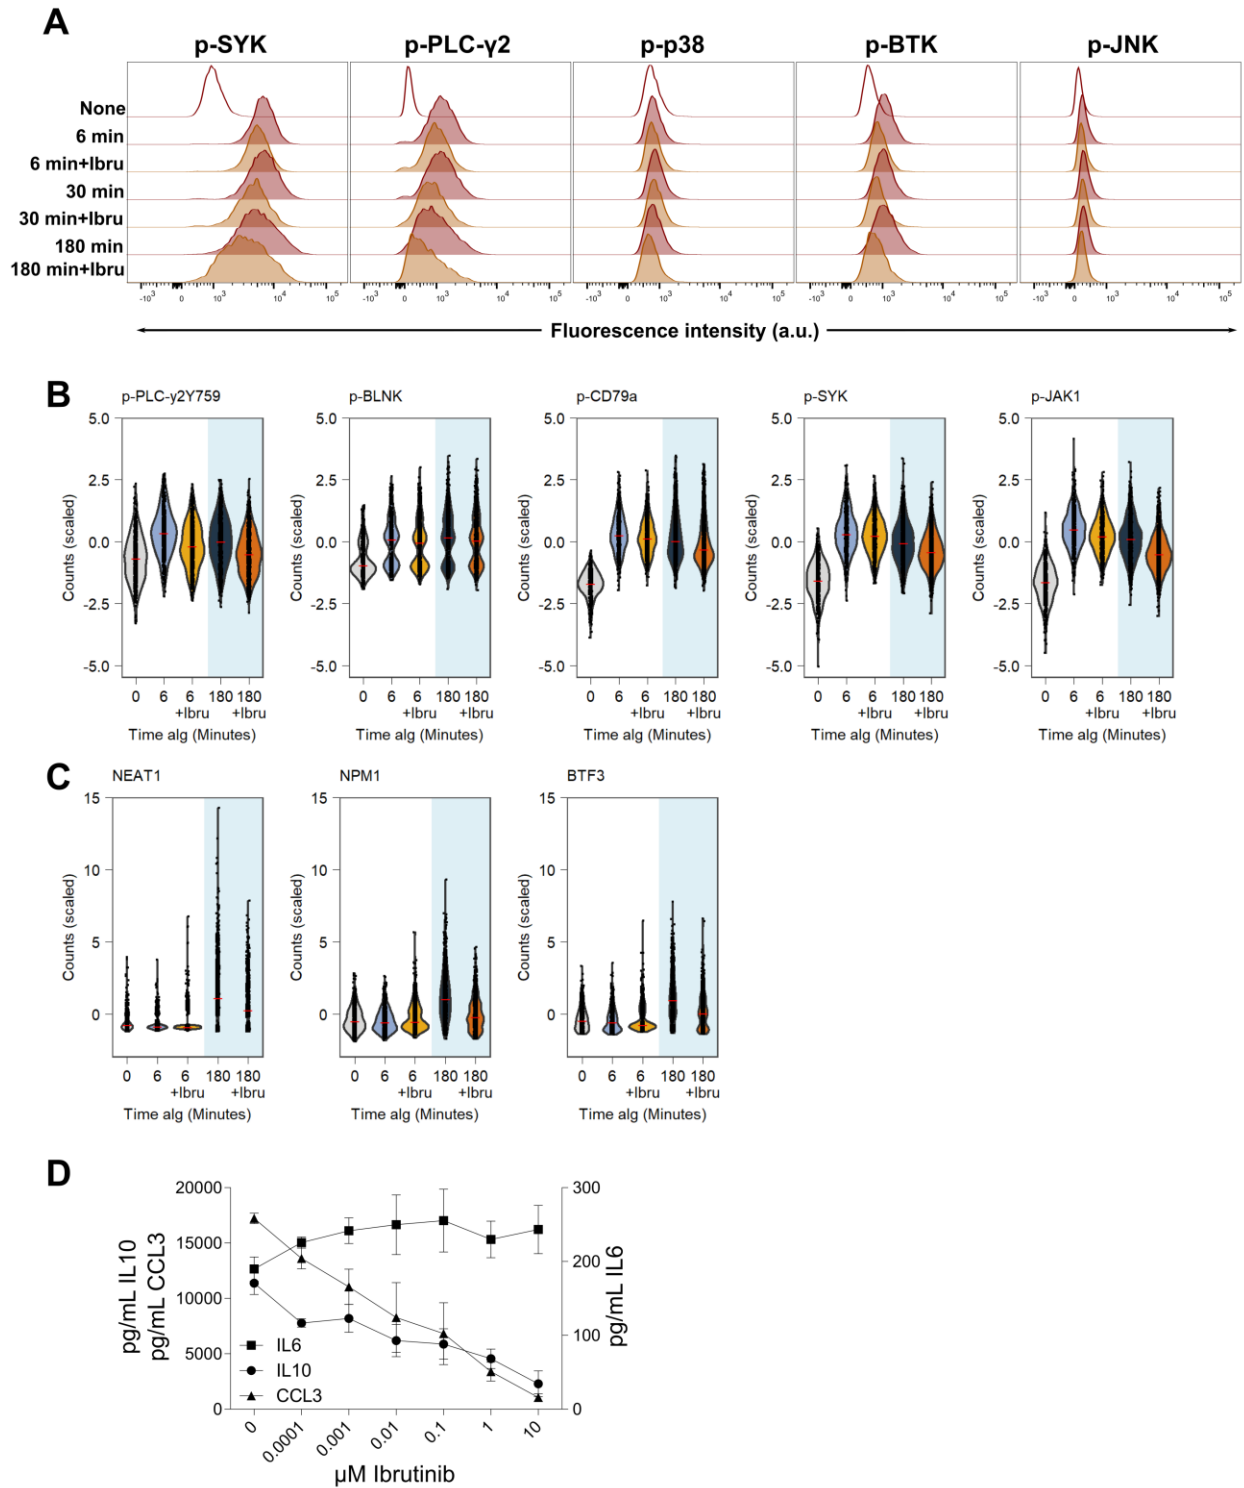

**Supplementary Figure 5: Cellular response to anti-immunoglobulin antibody (alg) stimulation in the presence of Ibrutinib (Ibru) inhibitor of Bruton's tyrosine kinase (BTK) . Related to Figure 3. (A) Flow cytometry characterization of the phosphorylation of SYK, PLC- $\gamma$ 2, p38, BTK, and JNK upon different stimulation conditions: unstimulated cells (0 minutes - red empty line); stimulation with alg for: 6, 30, and 180 minutes with (orange filled line) and without (red filled line) prior Ibru inhibition. (B) QuRIE-seq**



measurement of phosphoproteins. Scaled counts of signaling components up- or downstream of BTK: PLC- $\gamma$ 2, BLNK, CD79a, SYK, and JAK1 as a function of stimulation with alg for: 0, 6, and 180 minutes with and without Ibru. **(C)** Top 3 genes of factor 3 loadings in the QuRIE-seq measurement: *NEAT1*, *NPM1*, and *BTF3*, scaled counts as a function of stimulation with alg for: 0, 6, and 180 minutes with and without Ibru. **(D)** ELISA analysis of BJABs culture supernatant for cytokines upon overnight (16 hours) stimulation in the presence of Ibrutinib. Ibrutinib was used to block BTK (part of BCR signaling pathway), and titrated while cells were stimulated with alg (final concentration of 10  $\mu\text{g}/\text{ml}$ ). The dose-dependent decrease of cytokine secretion was observed for IL10 and CCL3, but not for IL6.

## Supplementary Tables

**Supplementary Table 1: Antibodies used for immunostaining of cells prior to microfluidic encapsulation. Related to STAR Methods section.**

|    | Target           | Ab sequence | barcode | Vendor                 | Clone        | Used concentration |
|----|------------------|-------------|---------|------------------------|--------------|--------------------|
| 1  | Histone H3       | CAATCCCT    |         | Cell Signaling 4499BF  | D1H2         | 0.1 µg/ml          |
| 2  | p-p65            | GTCCAGGC    |         | Cell Signaling 3033BF  | 93H1         | 1 µg/ml            |
| 3  | p-SYK            | TGTGTATA    |         | Cell Signaling 2710BF  | C87C1        | 1 µg/ml            |
| 4  | p-JNK            | AGGATCGA    |         | Cell Signaling 9255BF  | G9           | 1 µg/ml            |
| 5  | p-p38            | CACGATTC    |         | Cell Signaling 4511BF  | D3F9         | 1 µg/ml            |
| 6  | p-PLC-γ2         | GTATCGAG    |         | R&D Systems MAB37161   | 790623       | 1 µg/ml            |
| 7  | p-BTK            | TCTCGACT    |         | Biologend 601702       | A16128B      | 1 µg/ml            |
| 8  | p-SHP-2          | ACCCGCAC    |         | Cell Signaling 5431BFF | D66F10       | 1 µg/ml            |
| 9  | p-SHP-1          | CATGCGTA    |         | Cell Signaling 8849BF  | D11G5        | 1 µg/ml            |
| 10 | Cyclin E         | GTGATAGT    |         | ThermoFisher 32-1600   | HE12         | 1 µg/ml            |
| 11 | c-MYC            | TGATATCG    |         | ThermoFisher 700648    | 27H46L35     | 1 µg/ml            |
| 12 | p-RB             | AGGGCGTT    |         | ThermoFisher 701059    | 14H7L14      | 0.1 µg/ml          |
| 13 | p-c-JUN          | CTATACGC    |         | ThermoFisher MA5-27760 | GT653)       | 1 µg/ml            |
| 14 | active Caspase-3 | GCTCGTCA    |         | BD Bioscience 559565   | C92-605      | 1 µg/ml            |
| 15 | CD70             | TACATAAG    |         | BD Bioscience 555833   | Ki-24        | 1 µg/ml            |
| 16 | IgD              | AATTGAAC    |         | BD Bioscience 555776   | IA6-2        | 1 µg/ml            |
| 17 | CD86             | CCAGTGGA    |         | BD Bioscience 555655   | 2331 (FUN-1) | 1 µg/ml            |
| 18 | CD20             | GTCCATTG    |         | BD Bioscience 555677   | H1           | 0.1 µg/ml          |
| 19 | CD79a            | TGGACCCT    |         | BD Bioscience 555934   | HM47         | 0.1 µg/ml          |
| 20 | CD5              | AGCAGTTA    |         | BD Bioscience 555350   | UCHT2        | 1 µg/ml            |
| 21 | p-AKT            | CTTGTACC    |         | Cell Signaling 4060BF  | D9E          | 1 µg/ml            |
| 22 | S6               | GAACCCGG    |         | Cell Signaling 2317B   | 54D2         | 1 µg/ml            |
| 23 | ERK 1/2          | TCGTAGAT    |         | Cell Signaling 4696BF  | L34F12       | 1 µg/ml            |
| 24 | p38              | ACGCGGAA    |         | Cell Signaling 8690BF  | D13E1        | 1 µg/ml            |
| 25 | AKT              | CGCTATCC    |         | Cell Signaling 4685BF  | 11EE7        | 1 µg/ml            |
| 26 | SYK              | GTTGCATG    |         | Cell Signaling 13198BF | D3Z1E        | 1 µg/ml            |
| 27 | BTK              | TAAATCGT    |         | Cell Signaling 8547BF  | D3H5         | 0.1 µg/ml          |
| 28 | p-S6             | ATCGCCAT    |         | Cell Signaling 4858BF  | D57.2.2E     | 0.1 µg/ml          |
| 29 | p-ERK 1/2        | CATAAAGG    |         | Cell Signaling 5726BF  | D1H6G        | 1 µg/ml            |
| 30 | p65              | TCACGGTA    |         | Cell Signaling 8242BF  | D14E12       | 0.1 µg/ml          |
| 31 | CD19             | CACTCAAC    |         | SantaCruz sc-373897    | F-3          | 2 µg/ml            |
| 32 | p-Histon H3      | GCTGTGA     |         | Biologend 650802       | 11D8         | 0.1 µg/ml          |
| 33 | IgM              | TTGCGTCG    |         | Biologend 314502       | MHM-88       | 1 µg/ml            |
| 34 | Cyclin A         | ATATGAGA    |         | Biologend 644001       | E23.1        | 0.1 µg/ml          |
| 35 | p-Histon H2A.X   | CACCTCAG    |         | Biologend 613402       | 2F3          | 0.1 µg/ml          |

|    |                 |          |                         |           |           |
|----|-----------------|----------|-------------------------|-----------|-----------|
| 36 | Cyclin B1       | GCTACTTC | Biologend 647902        | V152      | 0.1 µg/ml |
| 37 | Ki-67           | TGGGAGCT | Biologend 350523        | Ki-67     | 0.1 µg/ml |
| 38 | JNK             | ATCCGGCA | R&D Systems AF1387      |           | 1 µg/ml   |
| 39 | SHP-1           | CCGTTATG | R&D Systems MAB1878     | 255402    | 1 µg/ml   |
| 40 | p-SRC           | GGTAATGT | R&D Systems MAB2685     | 1246F     | 1 µg/ml   |
| 41 | p-TOR           | TAAGCCAC | R&D Systems MAB1665     | 834115    | 0.1 µg/ml |
| 42 | GAPDH           | ACCGAACA | Biologend 607902        | W17079A   | 1 µg/ml   |
| 43 | BLNK            | GTTTGTGG | BD Biosciences 559930   | 2B11      | 1 µg/ml   |
| 44 | p-BLNK          | TAGACGAC | BD Biosciences 558366   | J117-1278 | 0.1 µg/ml |
| 45 | p-PKC-b1        | ACGCTTGG | ThermoFisher 702430     | 3H8L1     | 0.1 µg/ml |
| 46 | CD53            | CGCTACAT | BD Biosciences 555506   | HI29      | 0.1 µg/ml |
| 47 | CD38            | GAAAGACA | Biologend 303535        | HIT2      | 0.1 µg/ml |
| 48 | CD45            | TTTGCCTC | Biologend 304045        | HI30      | 0.1 µg/ml |
| 49 | p-IRAK4         | ATGGTCGC | Cell Signaling 11927S   | D6D7      | 1 µg/ml   |
| 50 | p-CD79a         | CGACATAG | Cell Signaling 14732BF  | D1B9      | 0.1 µg/ml |
| 51 | p-CDK1          | GATTCGCT | ThermoFisher 701808     | 17H29L7   | 1 µg/ml   |
| 52 | p-CDK4          | TCCAGATA | ThermoFisher 702556     | 9H2L7     | 1 µg/ml   |
| 53 | p-AMPK-a1/2     | ACTACTGT | ThermoFisher701068      | 10H2L20   | 0.1 µg/ml |
| 54 | p-AMPK-b1       | CGGGAACG | Thermo Fisher 700241    | 9H26L42   | 0.1 µg/ml |
| 55 | T-bet           | GACCTCTC | Biologend 644825        | 4B10      | 1 µg/ml   |
| 56 | p-IKK a/b       | TTATGGAA | ThermoFisher 701643     | 7H17L17   | 1 µg/ml   |
| 57 | CD27            | ACAGCAAC | Abcam ab192336          | EPR8569   | 0.1 µg/ml |
| 58 | p-JAK1          | CGCAATTT | ThermoFisher 700028     | 59H4L5    | 1 µg/ml   |
| 59 | p-PLC-γ2 (Y759) | GAGTTGCG | R&D Systems MAB7377     | 744757    | 0.1 µg/ml |
| 60 | IL10            | TTTCGCGA | ThermoFisher 16-7108-85 | JES3-9D7  | 1 µg/ml   |
| 61 | CCL3/4          | ACCAGTCC | R&D Systems MAB2701-100 | 93342     | 1 µg/ml   |
| 62 | CD80            | CTTTCCTT | Biologend 305212        | 2D10      | 1 µg/ml   |
| 63 | p-CDK6          | CTGGACGT | ThermoFisher            | 16HCLC    | 1 µg/ml   |
| 64 | p-STAT1         | GAACGGTC | ThermoFisher 33-3400    | ST1P-11A5 | 1 µg/ml   |
| 65 | p-STAT3         | TGTTACAG | Biologend 690402        | A16002B   | 1 µg/ml   |
| 66 | p-STAT5         | ATCTGATC | ThermoFisher 701063     | 6H5L15    | 1 µg/ml   |
| 67 | p-STAT6         | GAGAAGGG | ThermoFisher 700247     | 46H1L12   | 1 µg/ml   |
| 68 | KLF6            | TCACTCCT | ThermoFisher 39-6900    | 9A2       | 1 µg/ml   |
| 69 | BCL6            | AGATAACA | BD Biosciences 561520   | K112-91   | 1 µg/ml   |
| 70 | AID             | CTTATTTG | BD Biosciences 565784   | EK2-5G9   | 1 µg/ml   |
| 71 | IgG             | GCGGGCAT | BD Biosciences 555784   | G18-145   | 0.1 µg/ml |
| 72 | CD24            | TACCCGGC | RnD Systems MAB5247     | ML5       | 1 µg/ml   |
| 73 | IgA             | ATTGTTTC | Biologend 411502        | HP6123    | 0.5 µg/ml |
| 74 | IgE             | CGCAGGAG | Biologend 325502        | MHE-18    | 1 µg/ml   |
| 75 | CD23            | GCACCAGT | Abcam ab245732          | SP163     | 0.1 µg/ml |

|           |               |                 |                         |         |         |
|-----------|---------------|-----------------|-------------------------|---------|---------|
| <b>76</b> | <b>BLIMP1</b> | <b>TAGTACCA</b> | RnD Systems MAB36081    | 646702  | 1 µg/ml |
| <b>77</b> | <b>IRF8</b>   | <b>ATTCGTGC</b> | Biologend 656502        | 656502  | 1 µg/ml |
| <b>78</b> | <b>IRF4</b>   | <b>CGCGTGCA</b> | ThermoFisher 14-9858-82 | 3 E 4   | 1 µg/ml |
| <b>79</b> | <b>BAFF-R</b> | <b>GAATACTG</b> | RnD Systems MAB1162     | 2403C   | 1 µg/ml |
| <b>80</b> | <b>XBP1</b>   | <b>TCGACAAT</b> | Abcam ab239954          | EPR4086 | 1 µg/ml |

**Supplementary Table 2: Antibodies used for flow cytometry analysis of BJABs. Related to STAR Methods section.**

| <b>Target</b>    | <b>Fluorophore</b> | <b>Vendor</b>         | <b>Clone</b> | <b>Used concentration</b> |
|------------------|--------------------|-----------------------|--------------|---------------------------|
| <b>p-SYK</b>     | PE                 | Cell Signaling 6485   | C87C1        | 1/50                      |
| <b>p-PLC-γ2</b>  | Alexa 647          | BD Bioscience 558498  | K86-689.37   | 1/100                     |
| <b>p-BTK</b>     | PE                 | Biologend 601704      | A16128B      | 1/50                      |
| <b>p-p38</b>     | Alexa 488          | Cell Signaling 41768S | 3D7          | 1/50                      |
| <b>p-AKT</b>     | PE                 | Cell Signaling 5315   | D9E          | 1/50                      |
| <b>p-ERK 1/2</b> | PE                 | Cell Signaling 75765S | D1H6G        | 1/50                      |
| <b>p-JNK</b>     | Alexa 647          | Cell Signaling 9257S  | G9           | 1/50                      |
| <b>p-p65</b>     | Alexa 647          | Cell Signaling 5733   | 93H1         | 1/50                      |
| <b>p-S6</b>      | PE                 | Cell Signaling 5316   | D57.2.2E     | 1/800                     |

**Supplementary Table 3: Sequences of all the primers used for library preparation. Related to STAR Methods section.** All primers were ordered from Biolegio (The Netherlands).

|                                 | <b>Primer sequence 5' -&gt; 3'</b>                               | <b>Length (bp)</b> |
|---------------------------------|------------------------------------------------------------------|--------------------|
| <b>PE2-N6</b>                   | TCGGCATTCTGCTGAACCGCTCTTCCGATCT<br>NNNNN                         | 38                 |
| <b>PE1</b>                      | CAAGCAGAAGACGGCATACGAGAT [6-bp library index]<br>CTCTTCCCTACACGA | 46                 |
| <b>PE2</b>                      | AATGATACGGCGACCACCGAGATCTACACGGTCTCGGCATTCTGCTG<br>AAC           | 51                 |
| <b>Custom Read 1 primer</b>     | GGCATTCTGCTGAACCGCTCTTCCGATCT                                    | 30                 |
| <b>Custom Index Read primer</b> | AGATCGGAAGAGCGTCGTGTAGGGAAAGAG                                   | 30                 |
| <b>Custom Read 2 primer</b>     | CTCTTCCCTACACGACGCTCTTCCGATCT                                    | 30                 |
